# Supplementary material for: Evidence That Ion-Based Signaling Initiating at the Cell Surface Can Potentially Influence Chromatin Dynamics and Chromatin-Bound Proteins in the Nucleus
Source: PubMed Central journal article supplement (PMC6811650; doi:10.3389/fpls.2019.01267), 2019-10-17
Supplement: DataSheet_1.pdf [file DataSheet_1.pdf]

Membrane localized constructs:

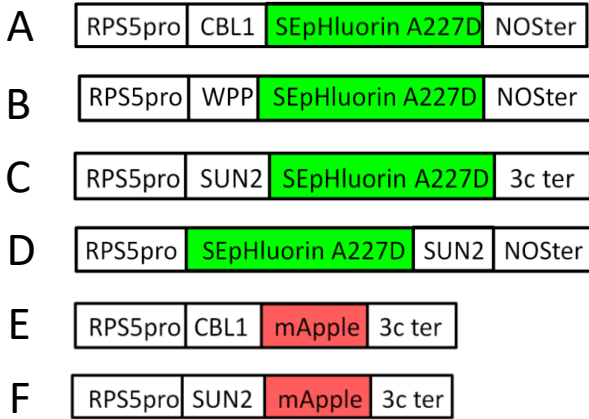

Cyto- and nucleoplasm constructs:

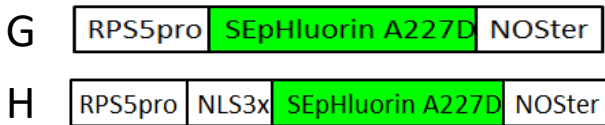

Constructs: with tet repressor

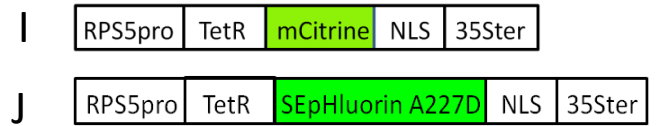

Constructs: with lac repressor

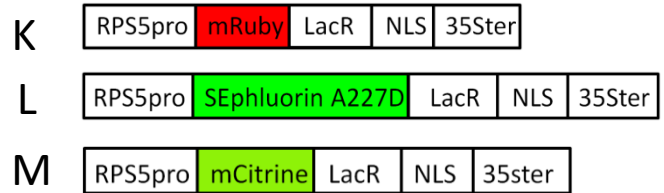

Combinations used in indicated figures:

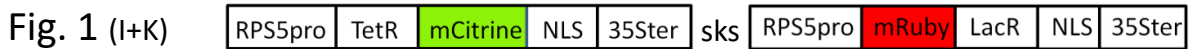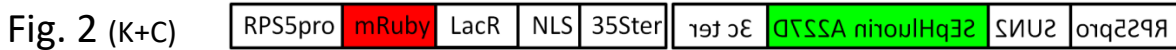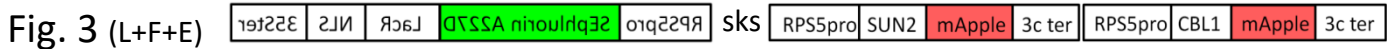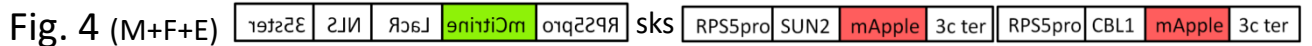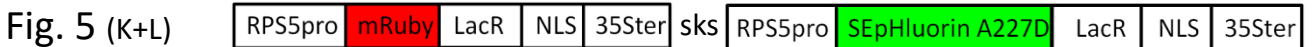

Data Sheet

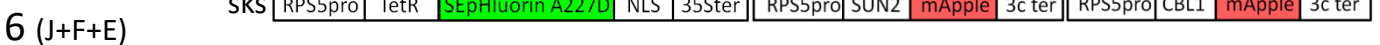

pH sensitivity of fluorescent proteins

**mCitrine – pH-insensitive** (Griesbeck et al., 2001)

**SEpHluorinA227D – pH-sensitive** (Matzke and Matzke, 2015)

**mRuby – pH-insensitive** (Kredel et al., 2009)

**mApple – pH-sensitive, but fast bleaching** (Shaner et al., 2008)

## Data Sheet 1: Constructs and pH sensitivity of fluorescent proteins used in this study

Constructs were produced avoiding *SalI*, *XhoI* and *SacII* sites – if necessary having DNA synthesis carried out by Genscript ([www.genscript.com](http://www.genscript.com)) using standard molecular biology techniques. Building block constructs A-L were assembled on modified pBC plasmids (Stratagene, Cat. Nr. 21215) between *SalI* and *XhoI* sites. *SalI/XhoI* digestion releases the construct from the pBC plasmids. The released construct was ligated into the *SalI* site of binary vector pPZP221 with a 35Spro-driven gentamicin selection marker (Hajdukiewicz et al., 1994). The above binary vector constructs can be cut again with *SalI* and for construct combinations, more *SalI/XhoI* assembled constructs can be added. Tagging the *SalI/XhoI* assembled construct with *SalI SacII KAN SacII XhoI* (abbreviated as ‘sks’ in the combination constructs) allows direct selection for the combination constructs used for **Figs. 1-5**. The KAN selection marker can be deleted with *SacII* (combination construct **Fig. 2**), and a third *SalI/XhoI* assembled construct can be added (combination constructs **Figs 3 and 4**).

The respective binary vectors containing the desired transgene construct were introduced via *Agrobacterium*-mediated transformation into *Arabidopsis thaliana* using the floral dip method (Clough and Bent 1998). Seeds harvested from the dipped plants were surface sterilized and dispersed on solid Murashige and Skoog medium containing cefotaxime (200µg/µl) to eliminate agrobacteria and gentamicin (100µg/µl) for selection of transgenic plants (primary transformants).

Abbreviations: CBL1, a plasma membrane targeting motif (Batistic et al., 1998); SUN2, targeting motif for inner nuclear membrane (INM) Graumann et al., 2010, 2014); WPP, an outer nuclear membrane (ONM) targeting sequence (Deal and Henikoff, 2010); NOSTer, nopaline synthase transcriptional terminator; 3Cter, transcriptional terminator from the *rbcS3C* gene (Benfey et al., 1989); 35Ster, transcriptional from cauliflower mosaic virus; *RPS5A* pro, promoter from the *RIBOSOMAL PROTEIN S5* (At3G11940) (Weijers et al., 2001); TetR, tetracycline repressor protein; LacR, Lac repressor protein; NLS, nuclear localization signal from SV40.

## References

- Batistic, O., Sorek, N., Schülke, S., Yalovsky, S., and Kudla, J. (2008). Dual fatty acyl modification determines the localization and plasma membrane targeting of CBL/CIPK Ca<sup>2+</sup> signaling complexes in *Arabidopsis*. *Plant Cell* 20, 1346-1362.
- Benfey, P.N., Ren, L., and Chua, N.H. (1989). The CaMV 35S enhancer contains at least two domains which can confer different development and tissue-specific expression patterns. *EMBO J.* 8, 2195-202.
- Clough, S.J., and Bent, A.F. (1998). Floral dip: a simplified method for *Agrobacterium*-mediated transformation of *Arabidopsis thaliana*. *Plant J.* 16, 735–743.
- Deal, R.B., and Henikoff, S. (2010). A simple methods for gene expression and chromatin profiling of individual cell types within a tissue. *Dev. Cell* 18,1030-1040.

- Graumann, K., Vanrobays, E., Tutois, S., Probst, A.V., Evans, D.E., and Tatout, C. (2014). Characterization of two distinct subfamilies of SUN-domain proteins in Arabidopsis and their interactions with the novel KASH-domain protein AtTIK. *J. Exp. Bot.* 65, 6499-6512.
- Graumann, K., Runions, J., and Evans, D.E. (2010). Characterization of SUN-domain proteins at the higher plant nuclear envelope. *Plant J.* 61, 134-144.
- Griesbeck, O., Baird, G.S., Campbell, E., Zacharias, D.A., and Tsien, R.Y. (2001). Reducing the environmental sensitivity of yellow fluorescent protein. *J. Biol. Chem.* 276, 29188–29194.
- Hajdukiewicz, P., Svab, Z., and Maliga, P. (1994). The small, versatile pPZP family of Agrobacterium binary vectors for plant transformation. *Plant Mol. Biol.* 25, 989–994.
- Kredel, S., Oswald, F., Nienhaus, K., Deuschle, K., Röcker, C., Wolff, M., Heilker, R., Nienhaus, G.U., and Wiedenman, J. (2009). mRuby, a bright monomeric red fluorescent protein for labeling of subcellular structures. *PLoS ONE* 4, 1-7.
- Matzke, A.J.M., and Matzke, M. (2015). Expression and testing of ArcLight, a genetically-encoded voltage indicator used in neuroscience research. *BMC Plant Biol.* 15: 245.
- Shaner, N.C., Lin, M.Z., McKeown, M.R., Steinbach, P.A., Hazelwood, K.L., Davidson, M.W., and Tsien, R.Y. (2008). Improving the photostability of bright monomeric orange and red fluorescent proteins. *Nat. Methods* 5, 545-551.
- Weijers, D., Franke-van Dijk, M., Vencken, R.J., Quint, A., Hooykaas, P., and Offringa, R. (2001). An Arabidopsis Minute-like phenotype caused by a semi-dominant mutation in a RIBOSOMAL PROTEIN S5 gene. *Development* 128, 4289-4299.
