# Supplementary material for: Evidence That Ion-Based Signaling Initiating at the Cell Surface Can Potentially Influence Chromatin Dynamics and Chromatin-Bound Proteins in the Nucleus
Source: PubMed Central journal article supplement (PMC6811650; doi:10.3389/fpls.2019.01267), 2019-10-17
Supplement: DataSheet_2.pdf [file DataSheet_2.pdf]

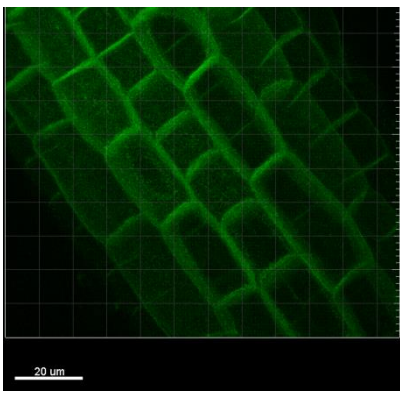

PM

RPS5pro CBL1 SEpHluorin A227D NOSter

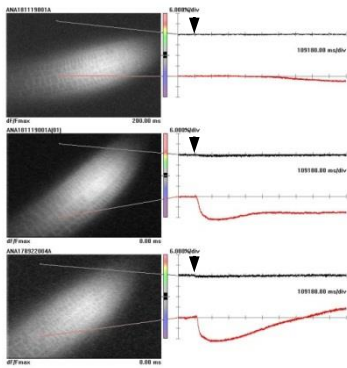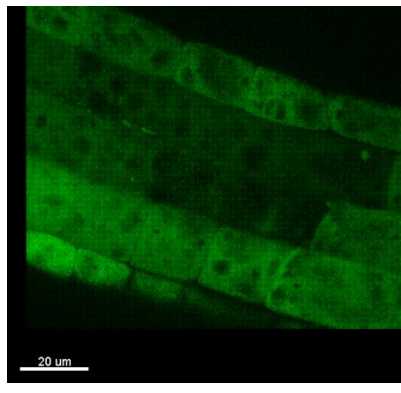

cytoplasm

RPS5pro SEpHluorin A227D NOSter

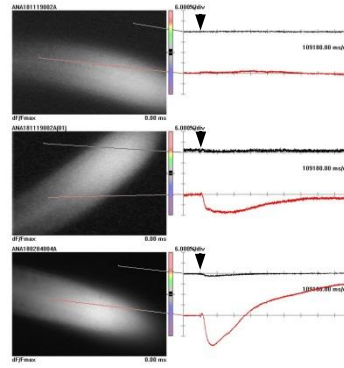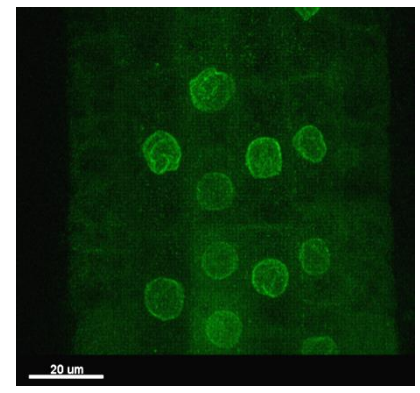

ONM

RPS5pro WPP SEpHluorin A227D NOSter

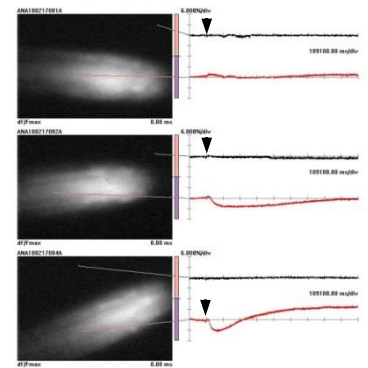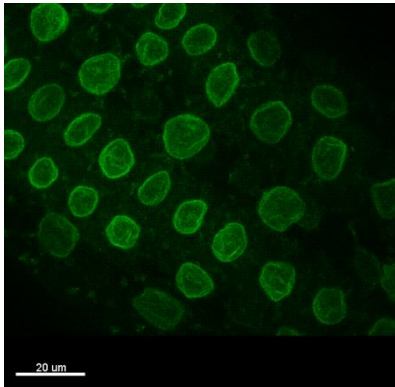

INM- perinuclear space

RPS5pro SUN2 SEpHluorin A227D 3Cter

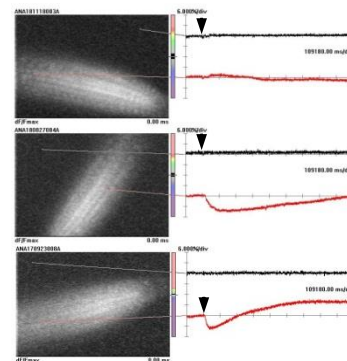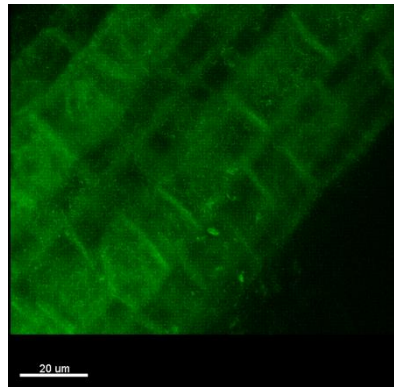

INM – nucleoplasmic face

RPS5pro SEpHluorin A227D SUN2 NOSter

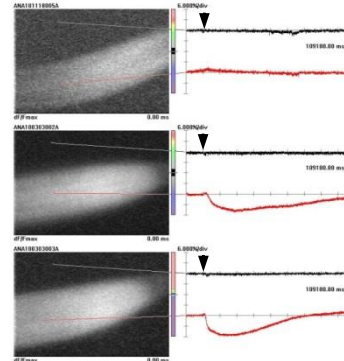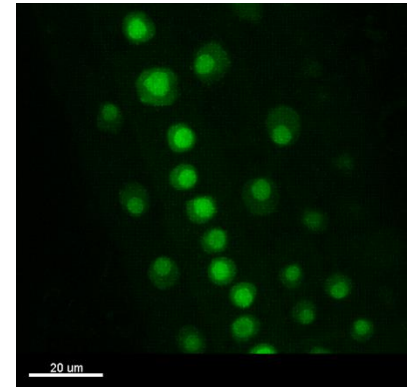

nucleoplasm

RPS5pro NLS3x SEpHluorin A227D NOSter

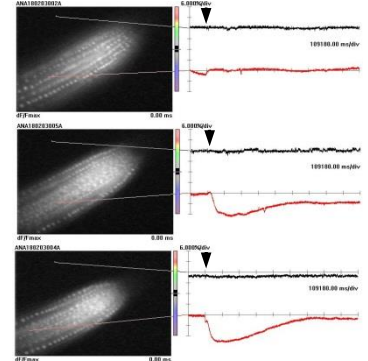

# PM

|         |      |                  |        |
|---------|------|------------------|--------|
| RPS5pro | CBL1 | SEpHluorin A227D | NOster |
|---------|------|------------------|--------|

ANA181119001A

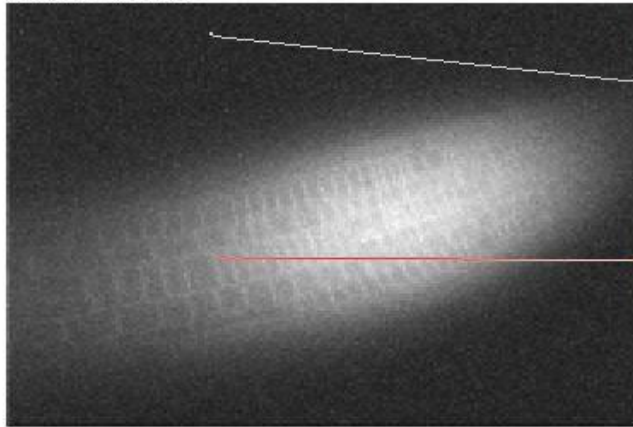

6.000%/div

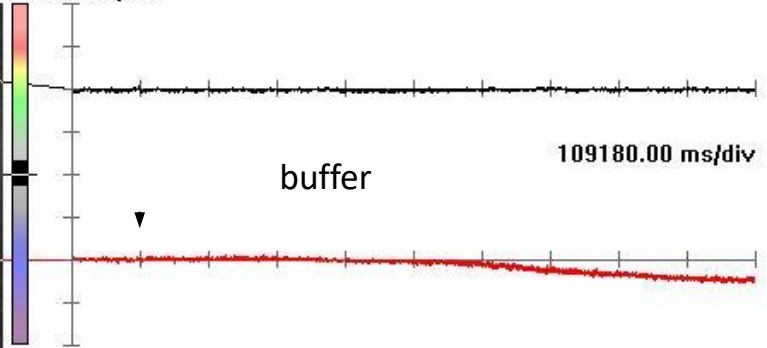

buffer

109180.00 ms/div

dF/Fmax

200.00 ms

ANA181119001A(01)

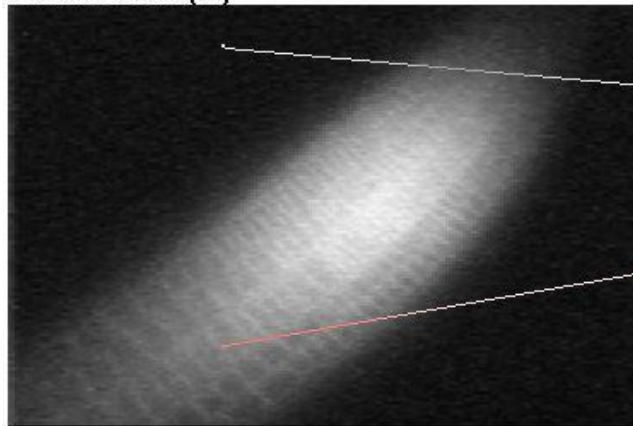

6.000%/div

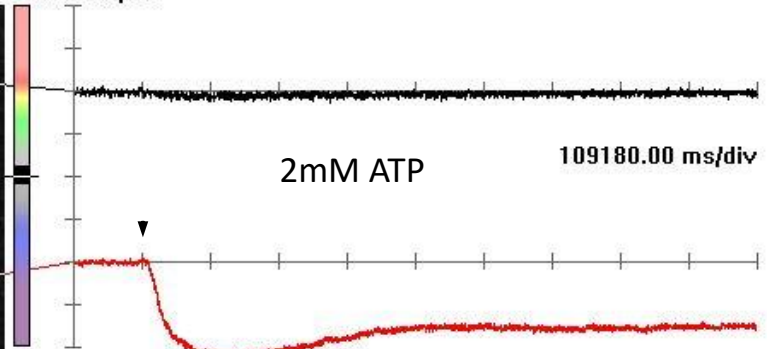

2mM ATP

109180.00 ms/div

dF/Fmax

0.00 ms

ANA170922004A

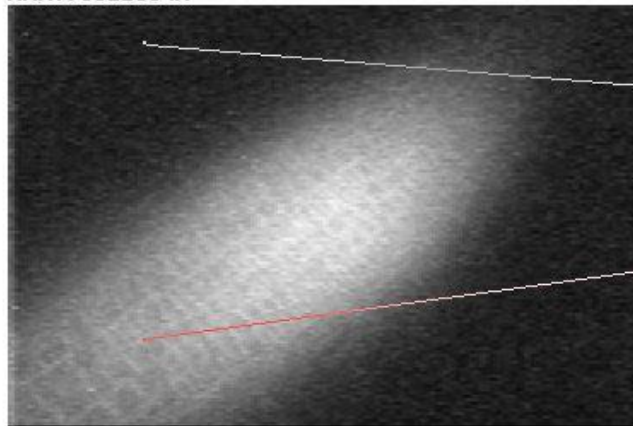

6.000%/div

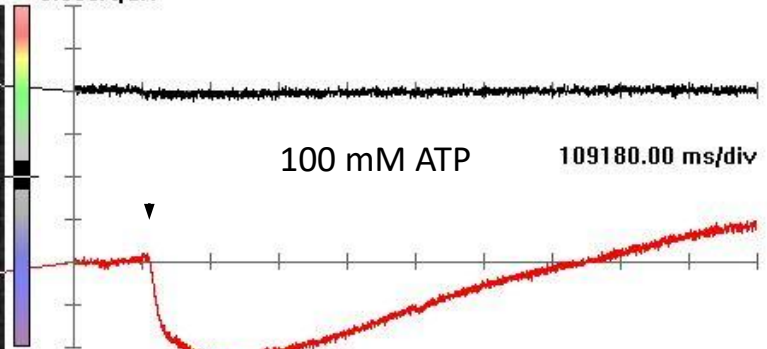

100 mM ATP

109180.00 ms/div

dF/Fmax

0.00 ms

# cytoplasm

RPS5pro SEpHluorin A227D NOster

ANA181119002A

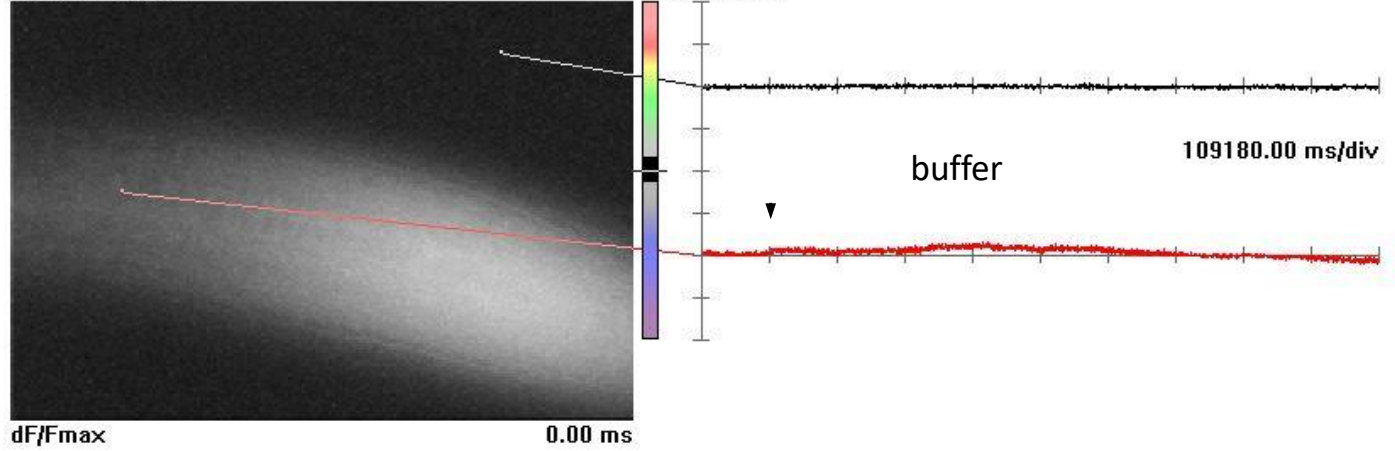

ANA181119002A[01]

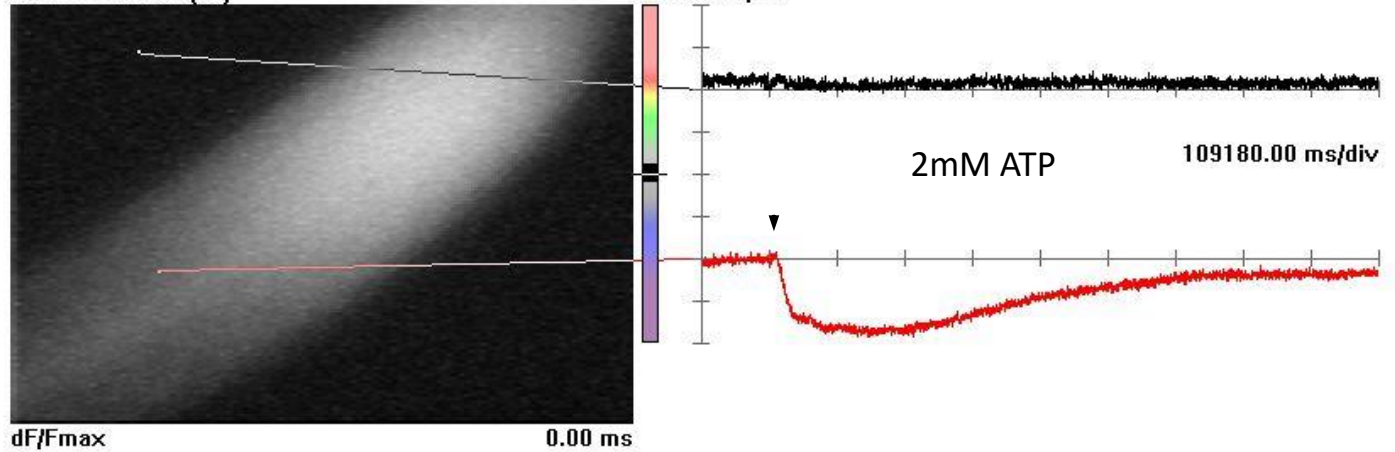

ANA180204004A

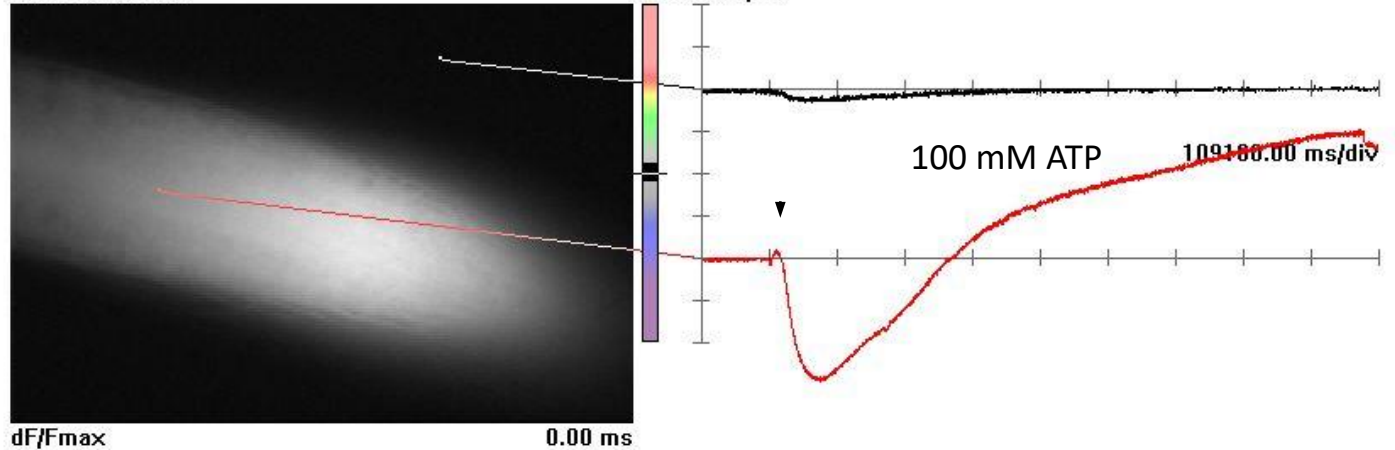

# ONM

RPS5pro WPP SEpHluorin A227D NOster

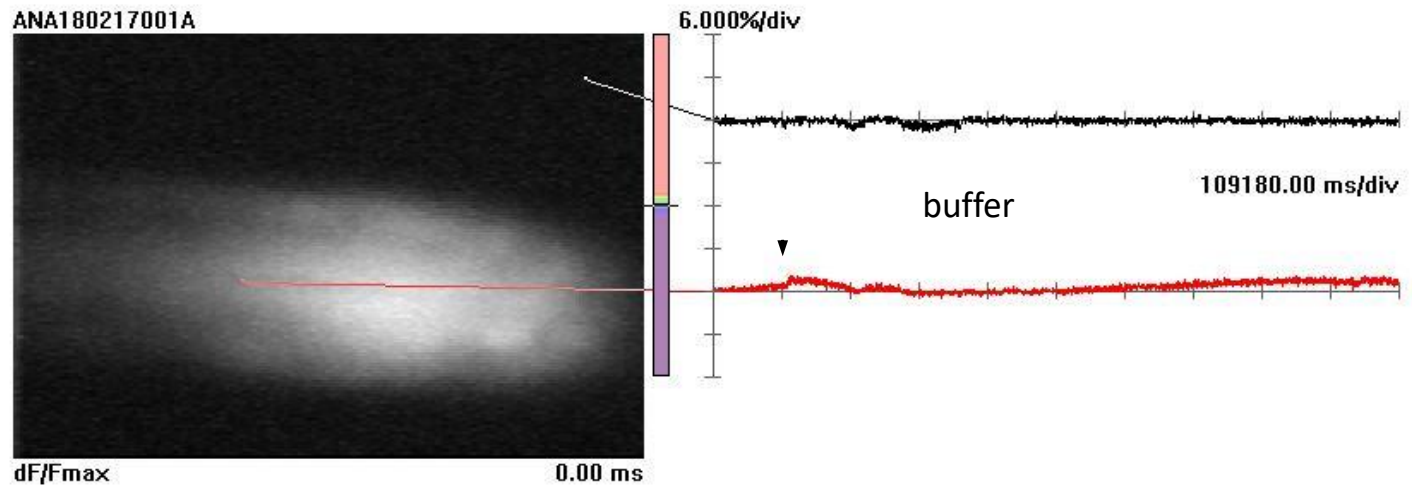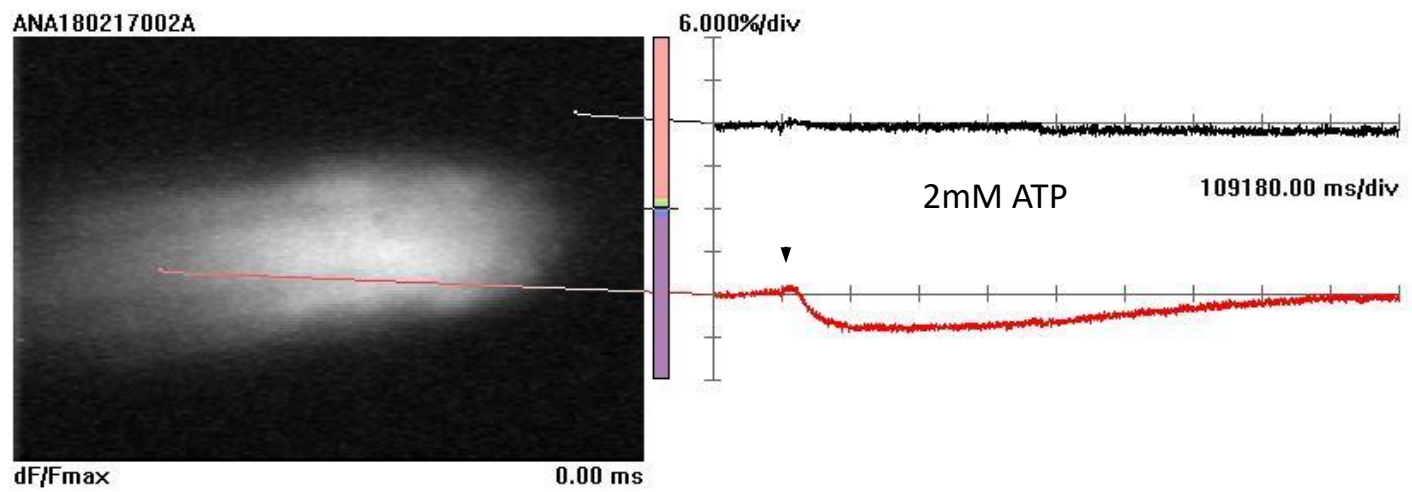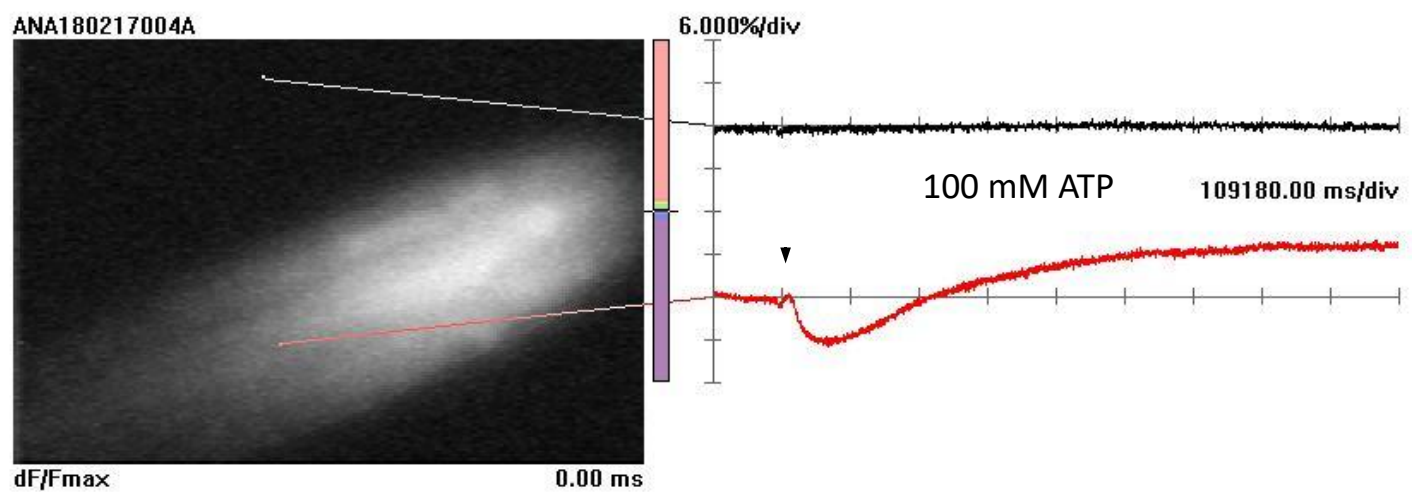

# INM perinuclear space

RPS5pro SUN2 SEpHluorin A227D 3Cter

ANA181118003A

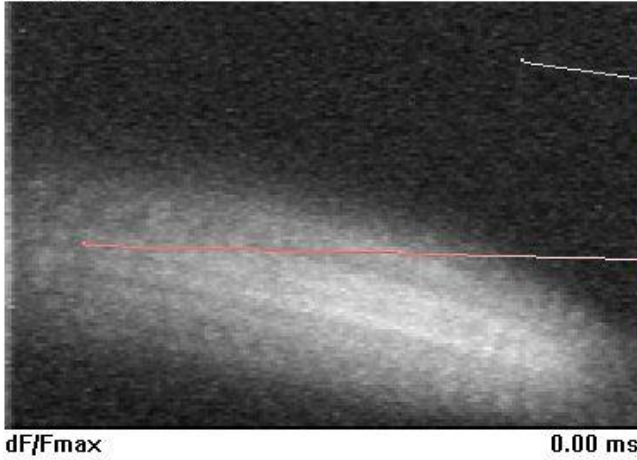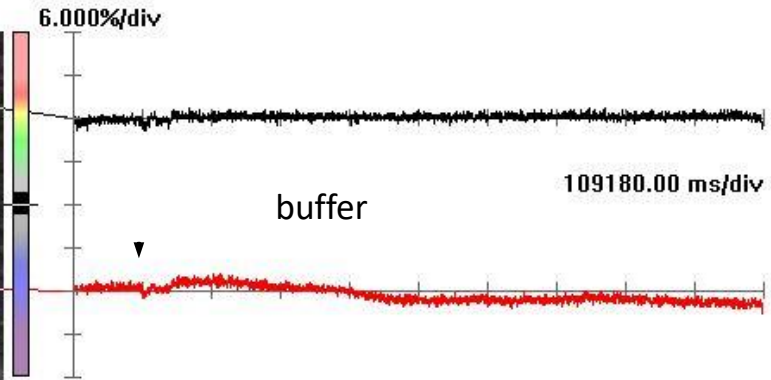

ANA180827004A

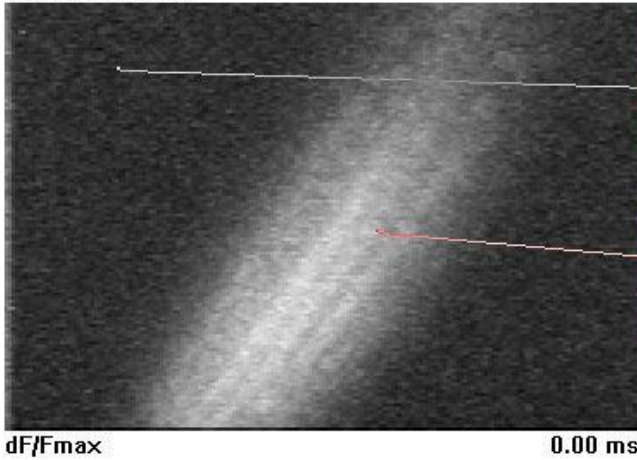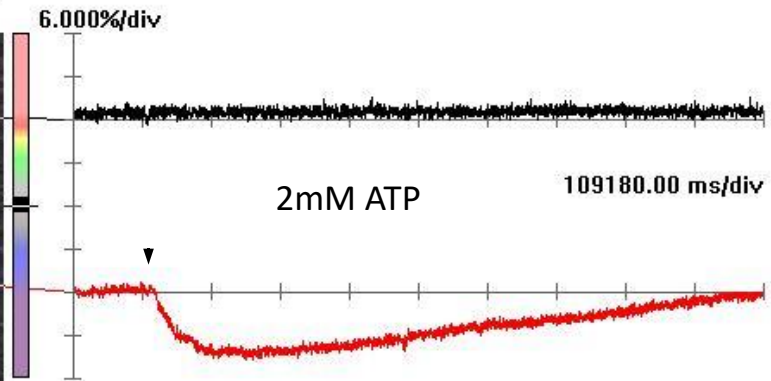

ANA170923008A

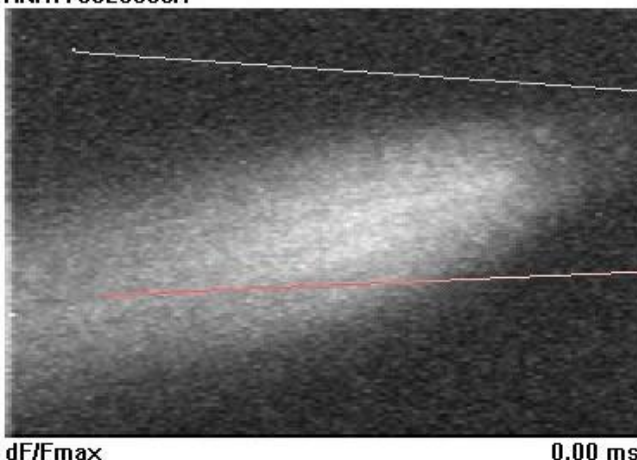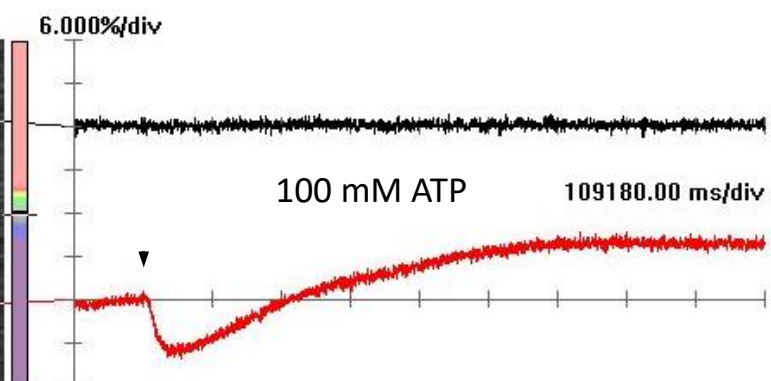

# INM nucleoplasm

RPS5pro SEpHluorin A227D SUN2 NOSter

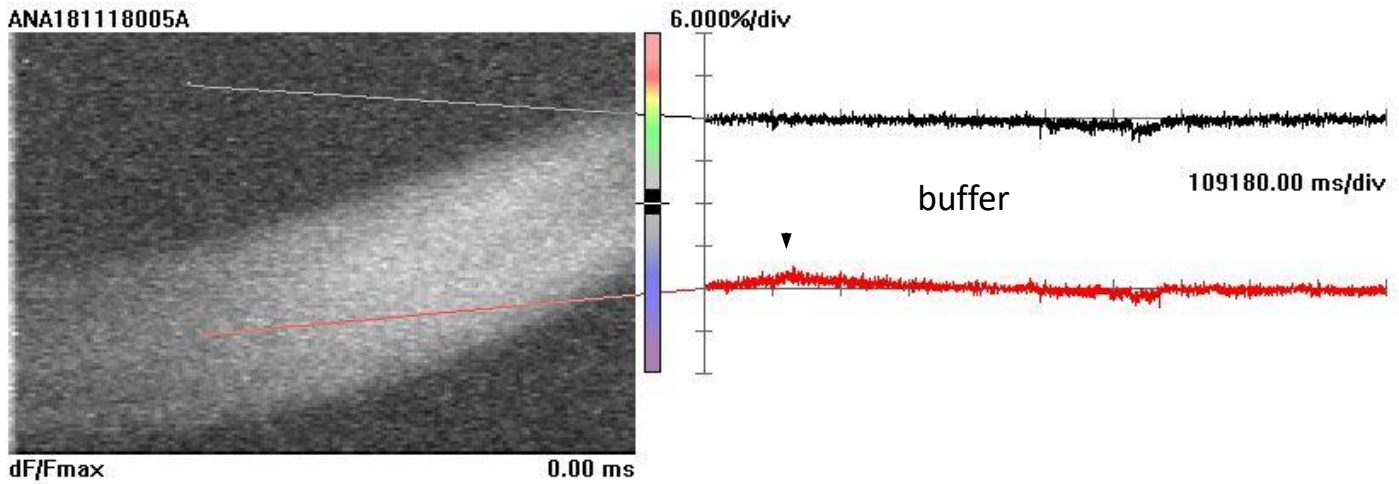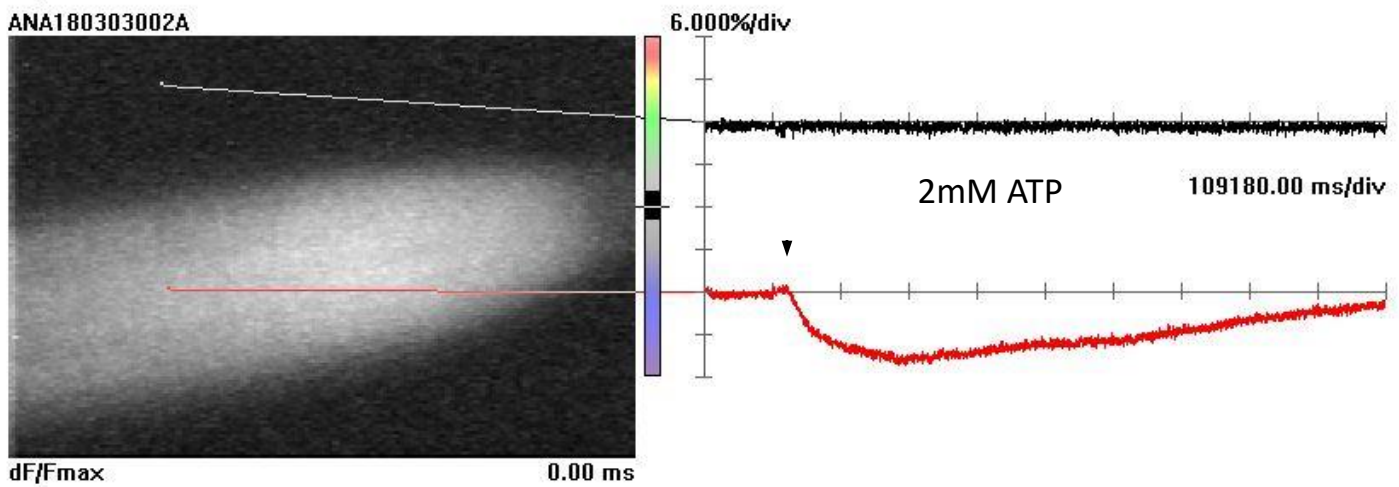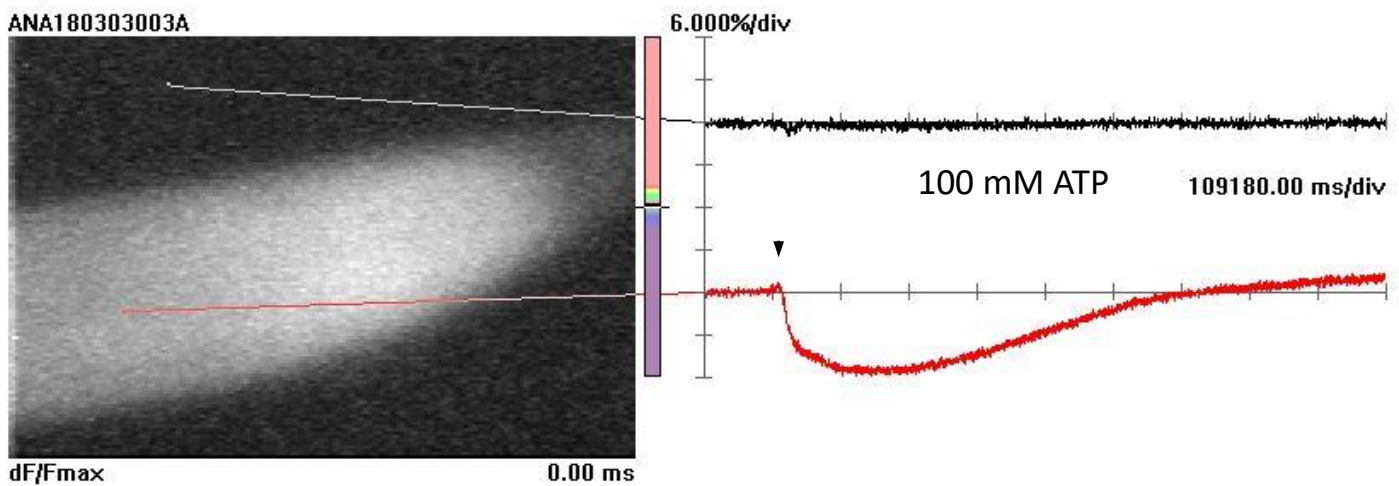

# nucleoplasm

RPS5pro

NLS3x

SEpHluorin A227D

NOSter

ANA180203002A

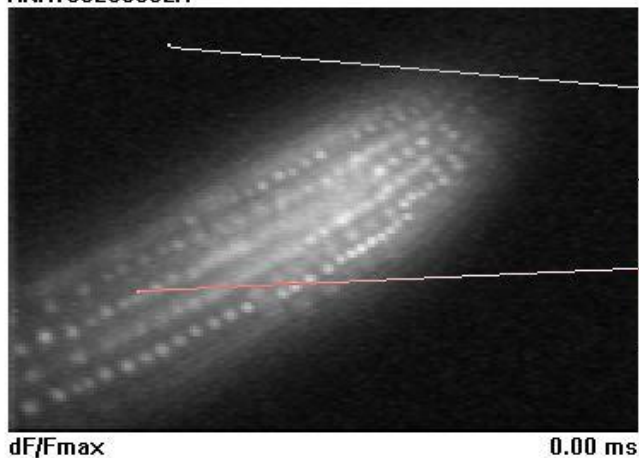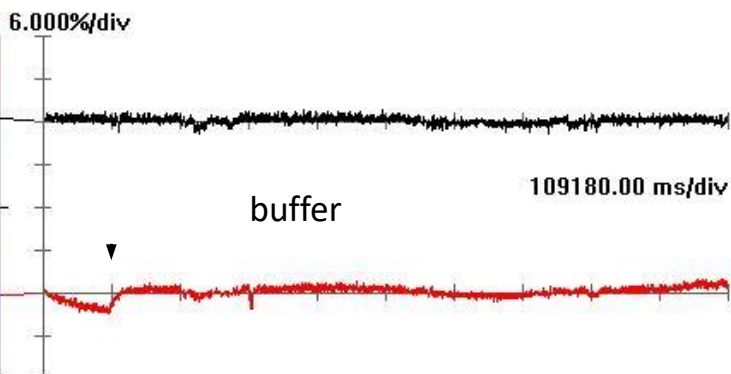

ANA180203005A

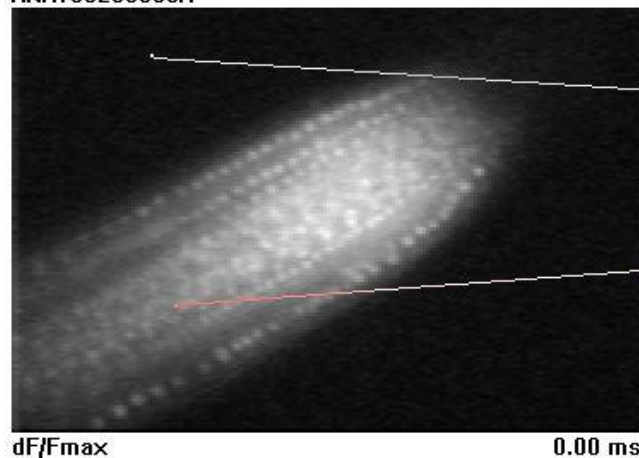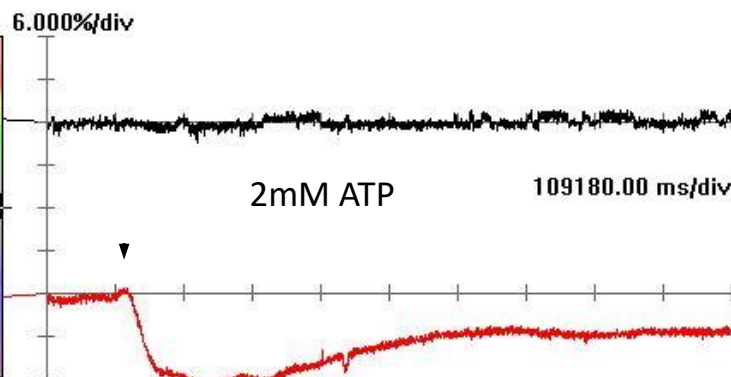

ANA180203004A

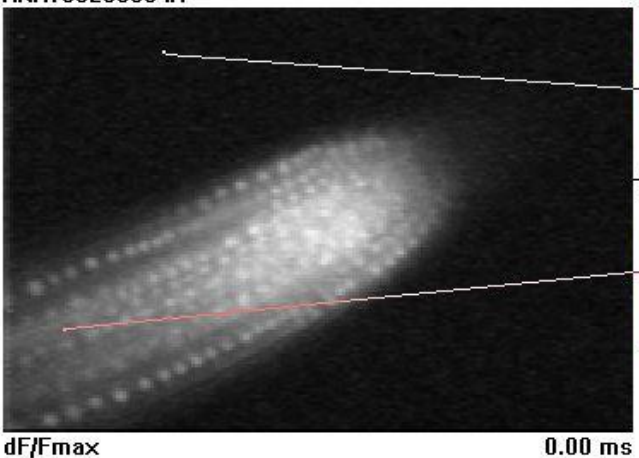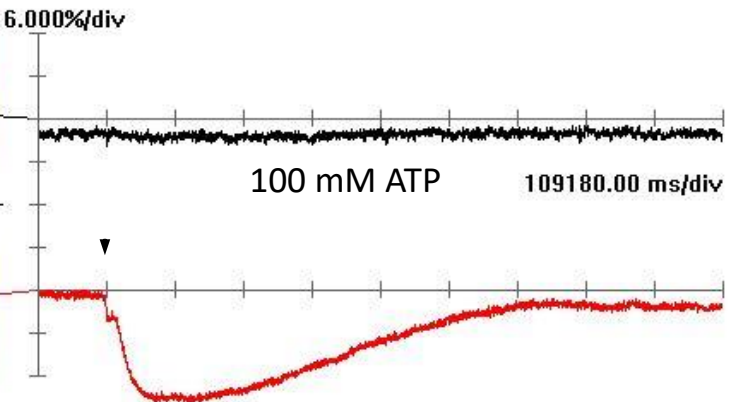

**Data Sheet 2:** Changes in membrane-bound and soluble SEpHluorinD fluorescence intensity in root tip cells in response to extracellular ATP (eATP). Representative data from one root n=1 are shown.

Experiments using SEpHluorinD targeted to the indicated locations indicate that application of eATP (arrowhead) provokes a pH change (reductions in SEpHluorinD fluorescence) over a period of 18 minutes at all sites tested. Method: Roots of living Arabidopsis seedlings were immobilized under an agarose block in a microscope slide dish (with the coverslip on the bottom of the dish). The root portions are then exposed to eATP by addition of eATP solutions (either 2 mM or 100 mM) to the edge of the agarose block. Buffer controls were also performed. Changes in SEpHluorinD fluorescence intensity in root tip cells were recorded using a high speed camera (MICAM02-HR, purchased from Major Instruments, Taiwan) mounted on an inverted microscope with a stable Xenon short ARC lamp (Ushio UXL-151DO from Ushio America) (Matzke and Matzke, 2015). The intensity changes were measured using BV-Analyzer(USB) x64 Edition Version 13. 12.20 from BrainVision Inc. Tokyo Japan.

Matzke, A.J.M., and Matzke, M. (2015). Expression and testing in plants of ArCLight, a genetically-encoded voltage indicator used in neuroscience research. *BMC Plant Biol.* 15, 245.

**Figures** shown on **pages 2-7** are magnifications of the six cellular locations (p. 1) shown for better viewing of the numbers:

These **Figures** show similar responses following either eATP or buffer addition of SEpHluorinD targeted to different cellular locations: **(p. 2)** CBL1-SEpHluorinD [at the plasma membrane (PM)]; **(p. 3)** SEpHluorinD in the cytoplasm; **(p. 4)** WPP-SEpHluorinD [at the outer nuclear membrane (ONM) facing the cytoplasm]; **(p. 5)** SUN2-SEpHluorinD (at the inner nuclear membrane (INM) facing the perinuclear space (PNS)); **(p. 6)** SEpHluorinD-SUN2 at the INM facing the nucleoplasm; and **(p. 7)** NLS3x- SEpHluorinD in the nucleoplasm.

The traces are derived from the regions of the root indicated by the lines connecting the traces (right) and the point of measurement in the image (left; MiCAM image, 20x objective) and are displayed over a time period of 1091800 milli-seconds (msec). Either buffer (top), 2 mM ATP (middle), or 100 mM ATP (bottom) was added at approximately 120000 msec as indicated by the black arrow-heads. Fractional fluorescence changes (%dF/Fmax) were calculated by the BV-Analyzer software supplied with the MiCAM camera. The divisions of the Y-axis are set at 6%. The X-axis shows time in msec (the divisions are set to 109180 msec) .

The indicated cells show a qualitatively response following addition of either eATP (2 mM and 100 mM) or buffer (red traces). The background trace, which remains unchanged following addition of eATP, is shown at the top of each trace in black.
