# Supplementary material for: Evidence That Ion-Based Signaling Initiating at the Cell Surface Can Potentially Influence Chromatin Dynamics and Chromatin-Bound Proteins in the Nucleus
Source: PubMed Central journal article supplement (PMC6811650; doi:10.3389/fpls.2019.01267), 2019-10-17
Supplement: DataSheet_5.pdf [file DataSheet_5.pdf]

20 $\mu$ l Gilson  
Pipetman with  
Teflon tubing  
1mm diameter

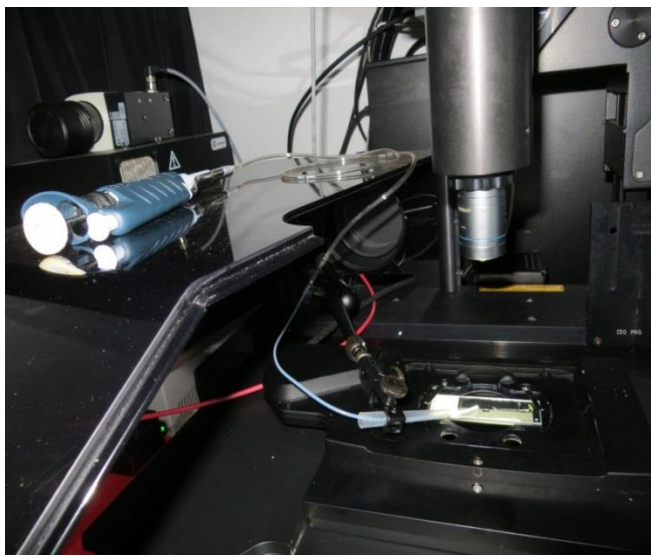

Teflon tubing  
aimed at the  
perforation  
in the cover slip

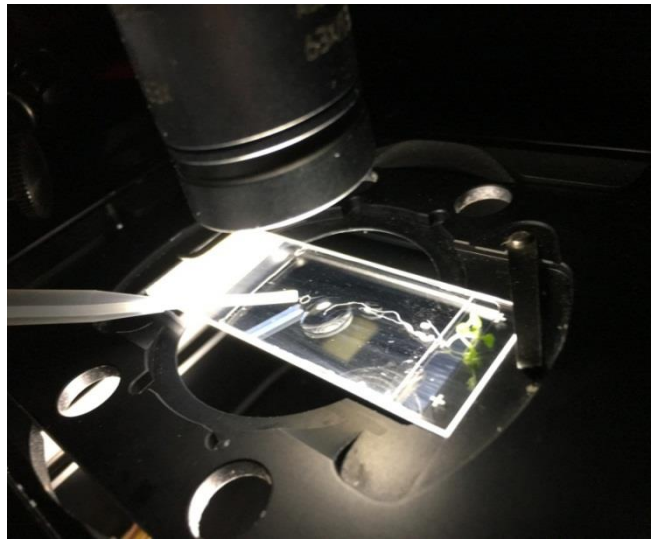

after lowering  
63x objective

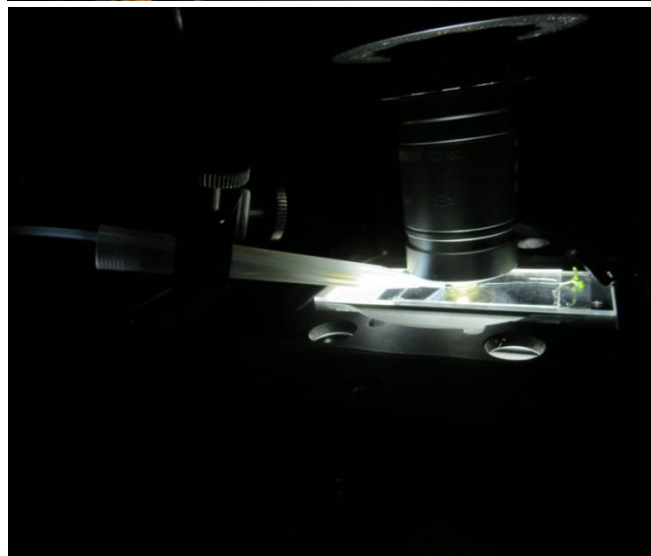

**Data Sheet 5:** Procedure for adding eATP during confocal microscopy and data acquisition

Top: View of the Gilson pipetman attached to teflon tubing held in place for aiming at the perforation in the cover slip

Middle: Close-up view of the teflon tubing over the perforation in the cover slip ~5 mm away from the root tip of the seedling mounted on a microscope slide

Bottom: View after lowering the 63X objective into place for starting data acquisition.

After 13 min during the red channel acquisition, the eATP is ejected from the pipetman through the perforation to reach the root tip. For further details, see Materials and Methods.
