# Supplementary material for: Evidence That Ion-Based Signaling Initiating at the Cell Surface Can Potentially Influence Chromatin Dynamics and Chromatin-Bound Proteins in the Nucleus
Source: PubMed Central journal article supplement (PMC6811650; doi:10.3389/fpls.2019.01267), 2019-10-17
Supplement: DataSheet_9.pdf [file DataSheet_9.pdf]

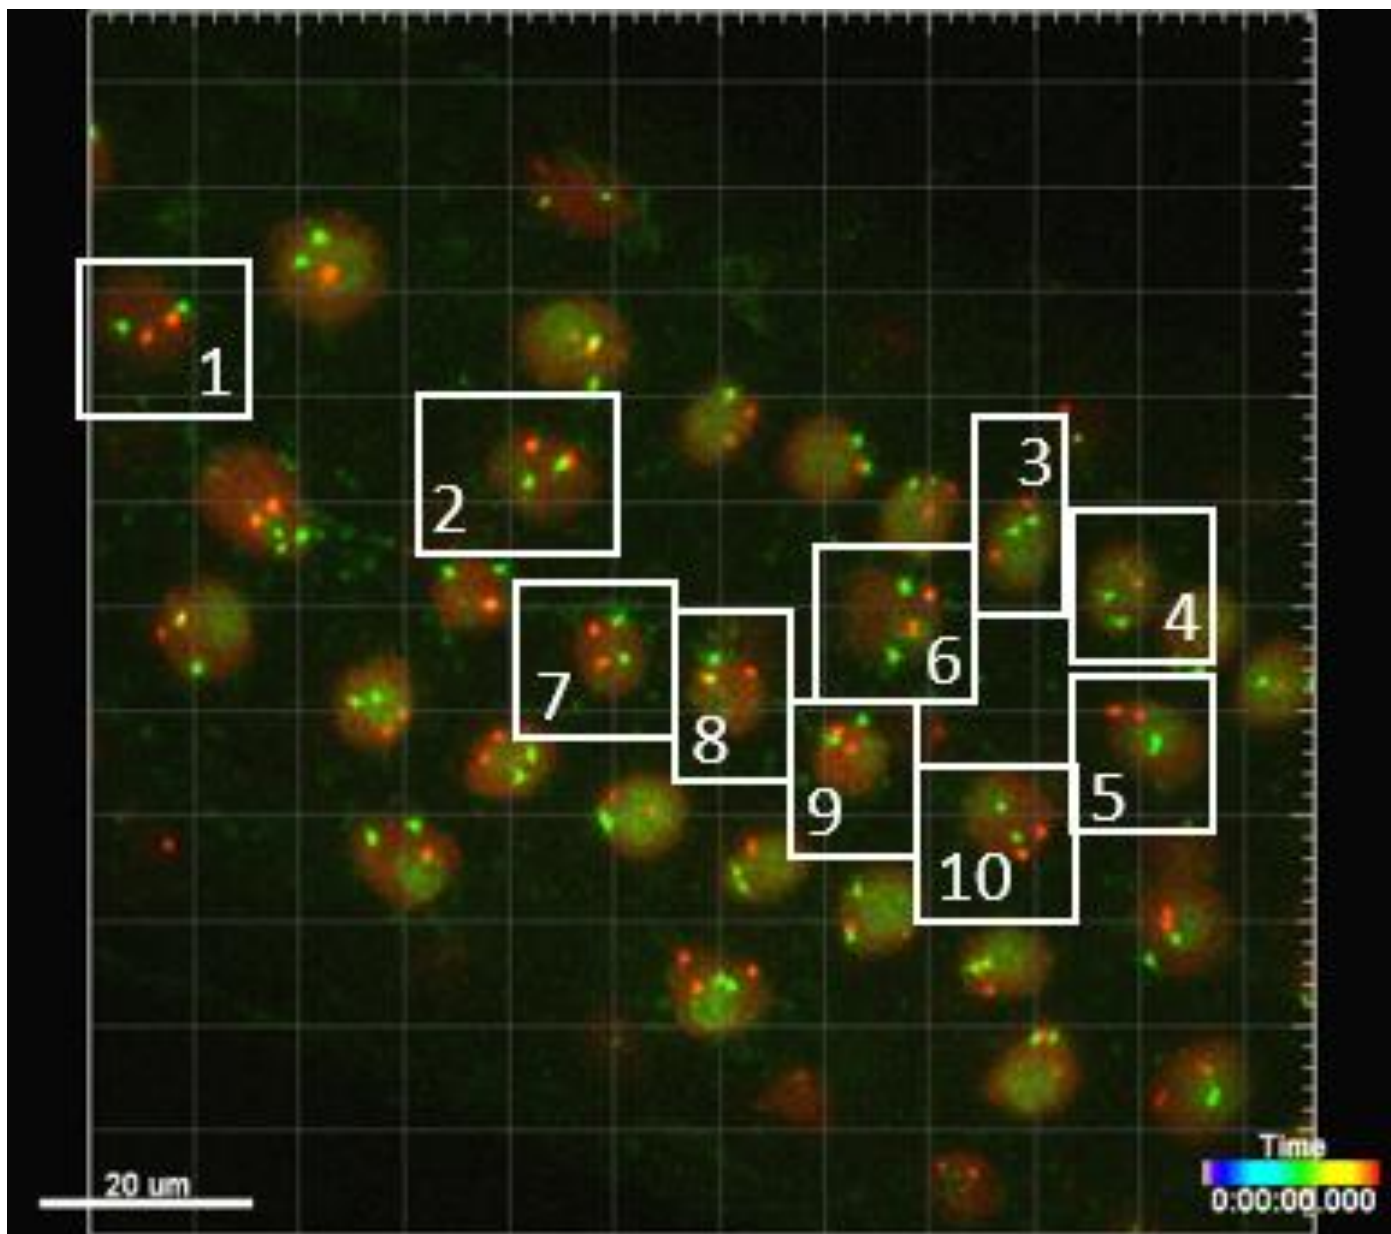

**Figure 1B top  
(enlarged)**

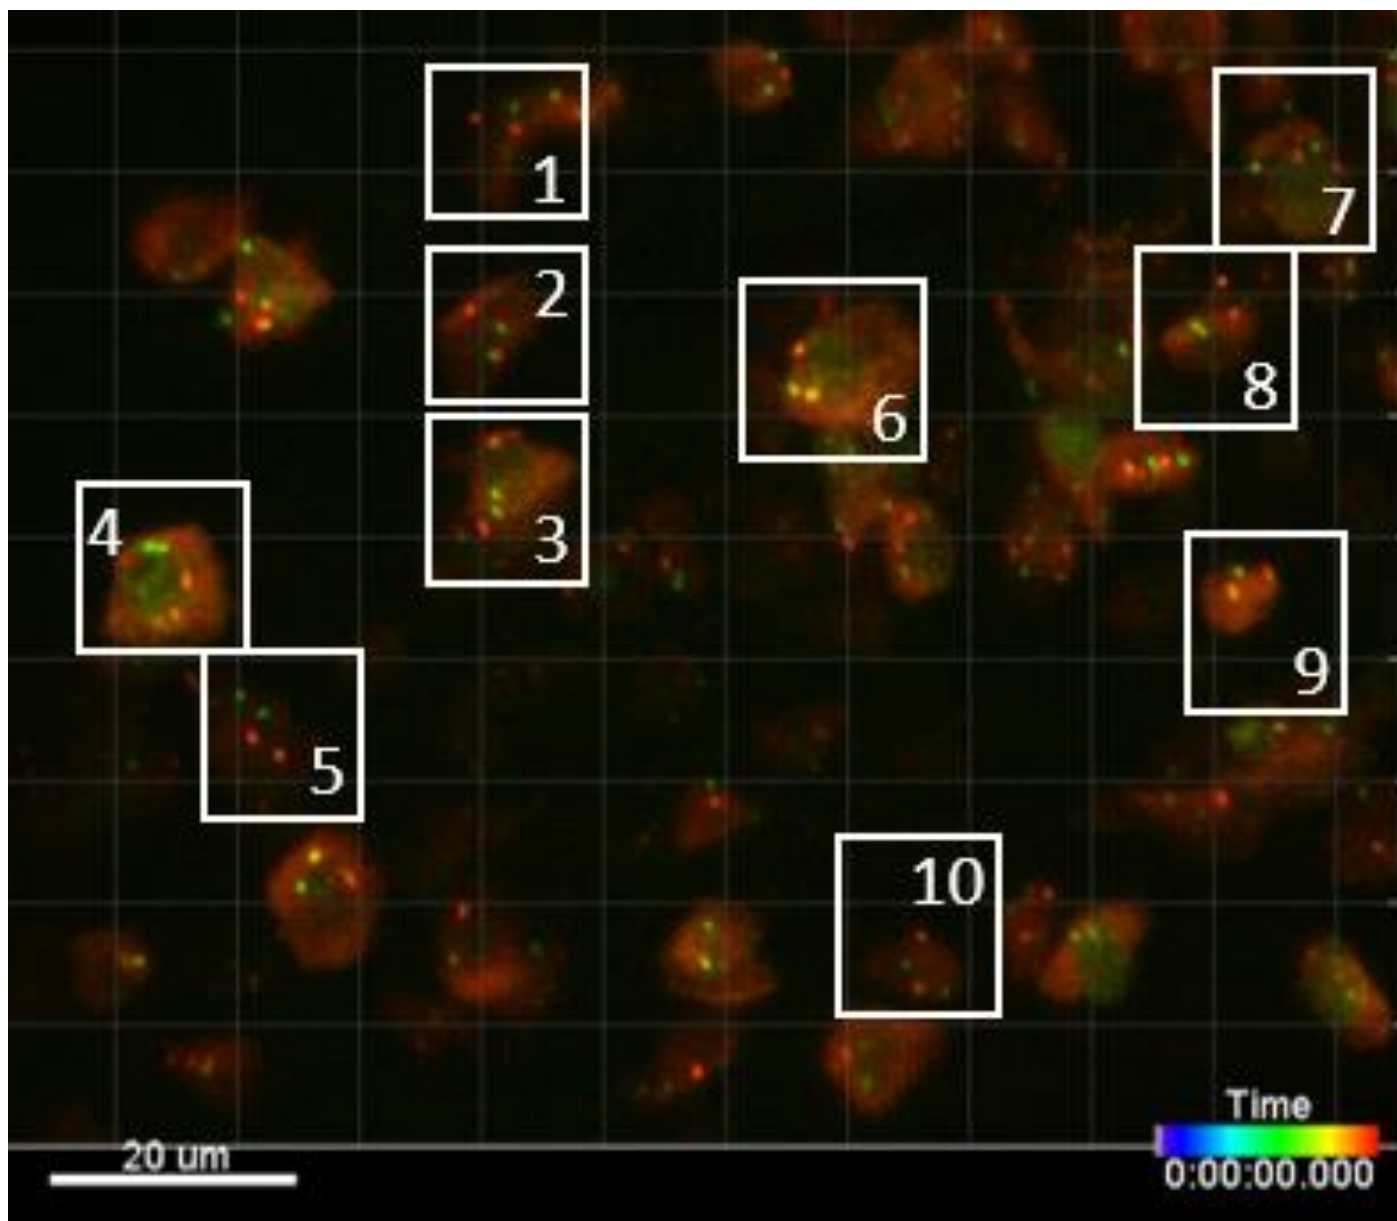

**Figure 1D bottom  
(enlarged)**

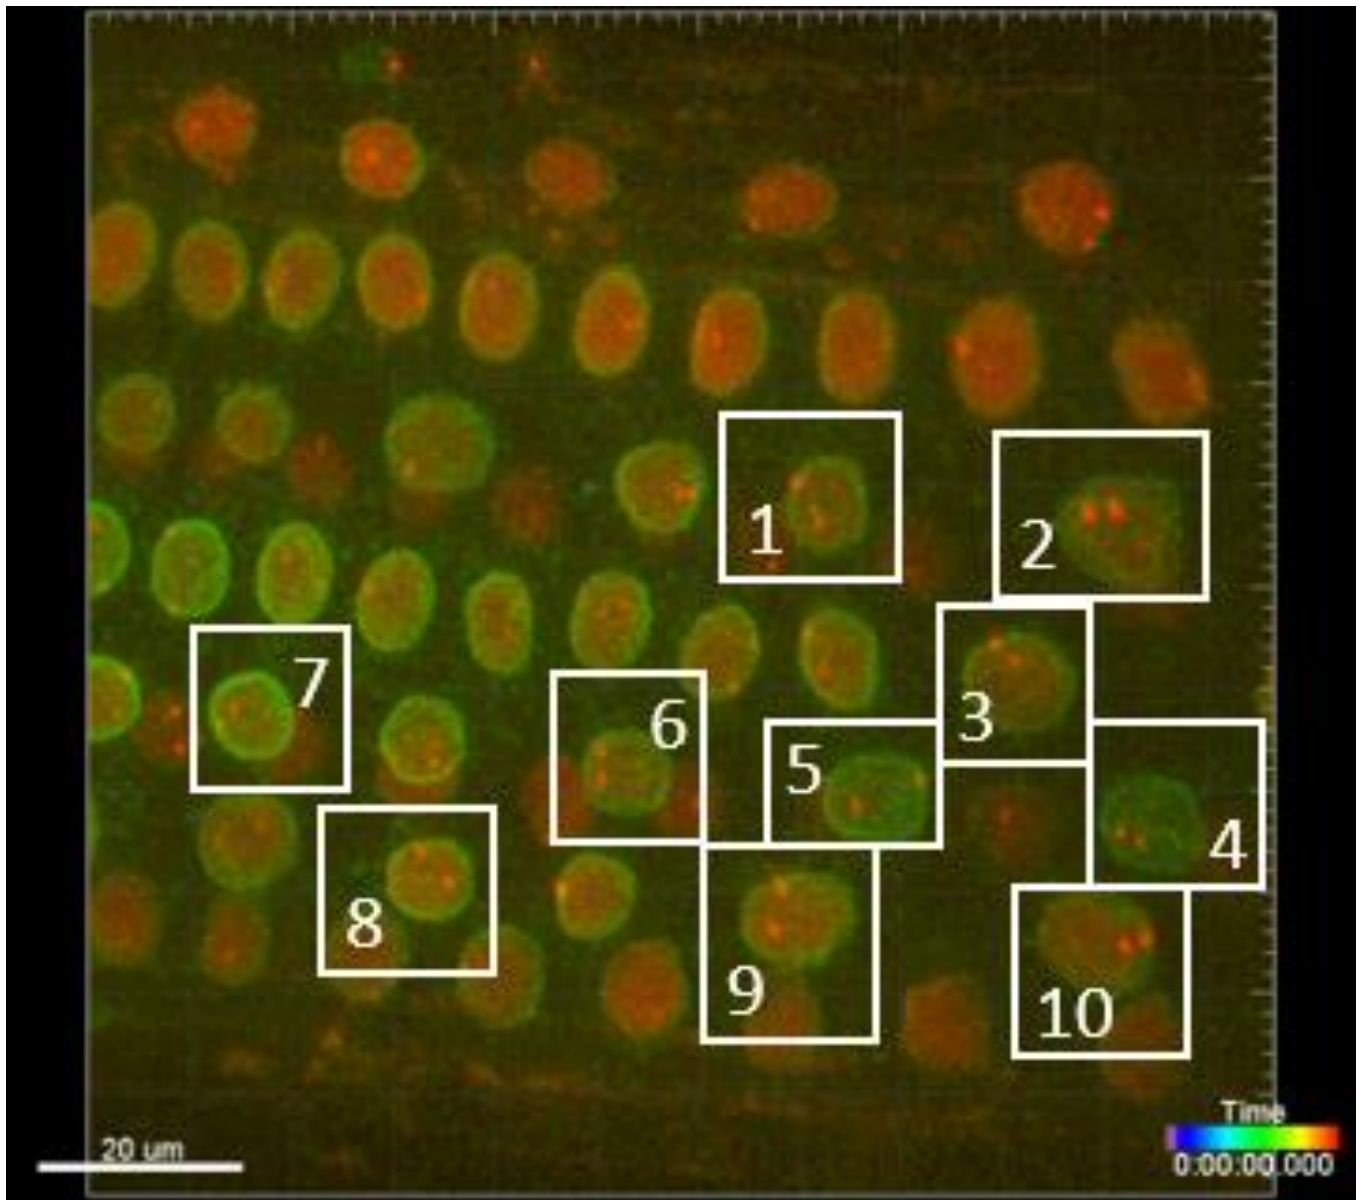

**Figure 2B  
(enlarged)**

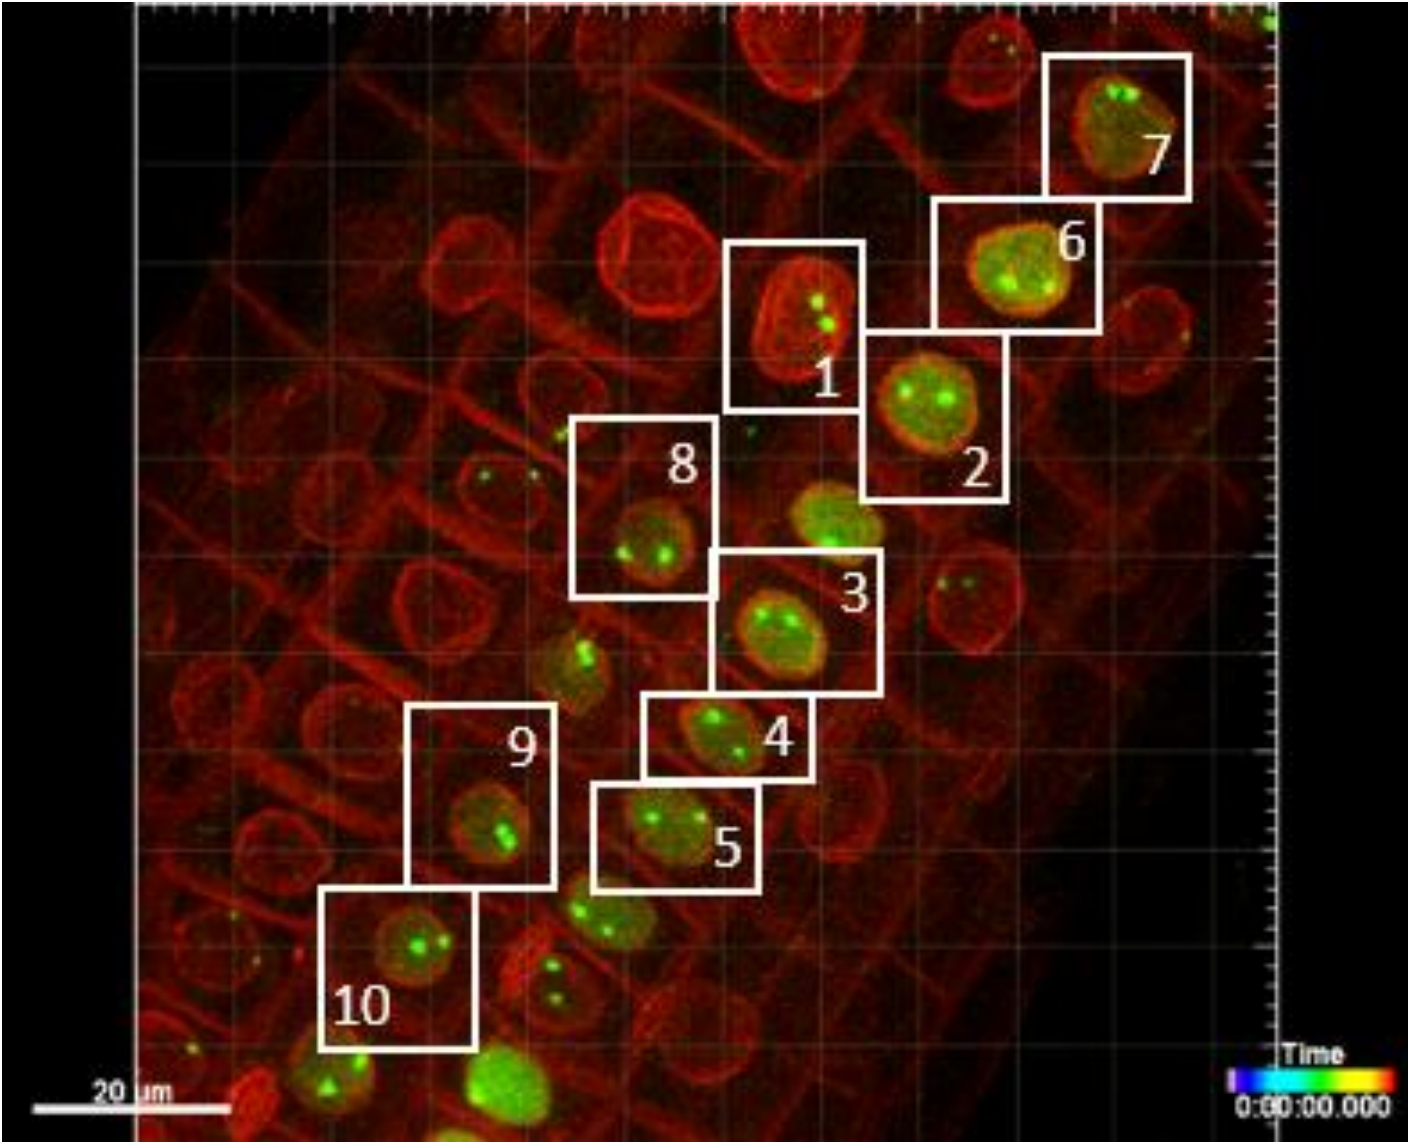

**Figure 3B top  
(enlarged)**

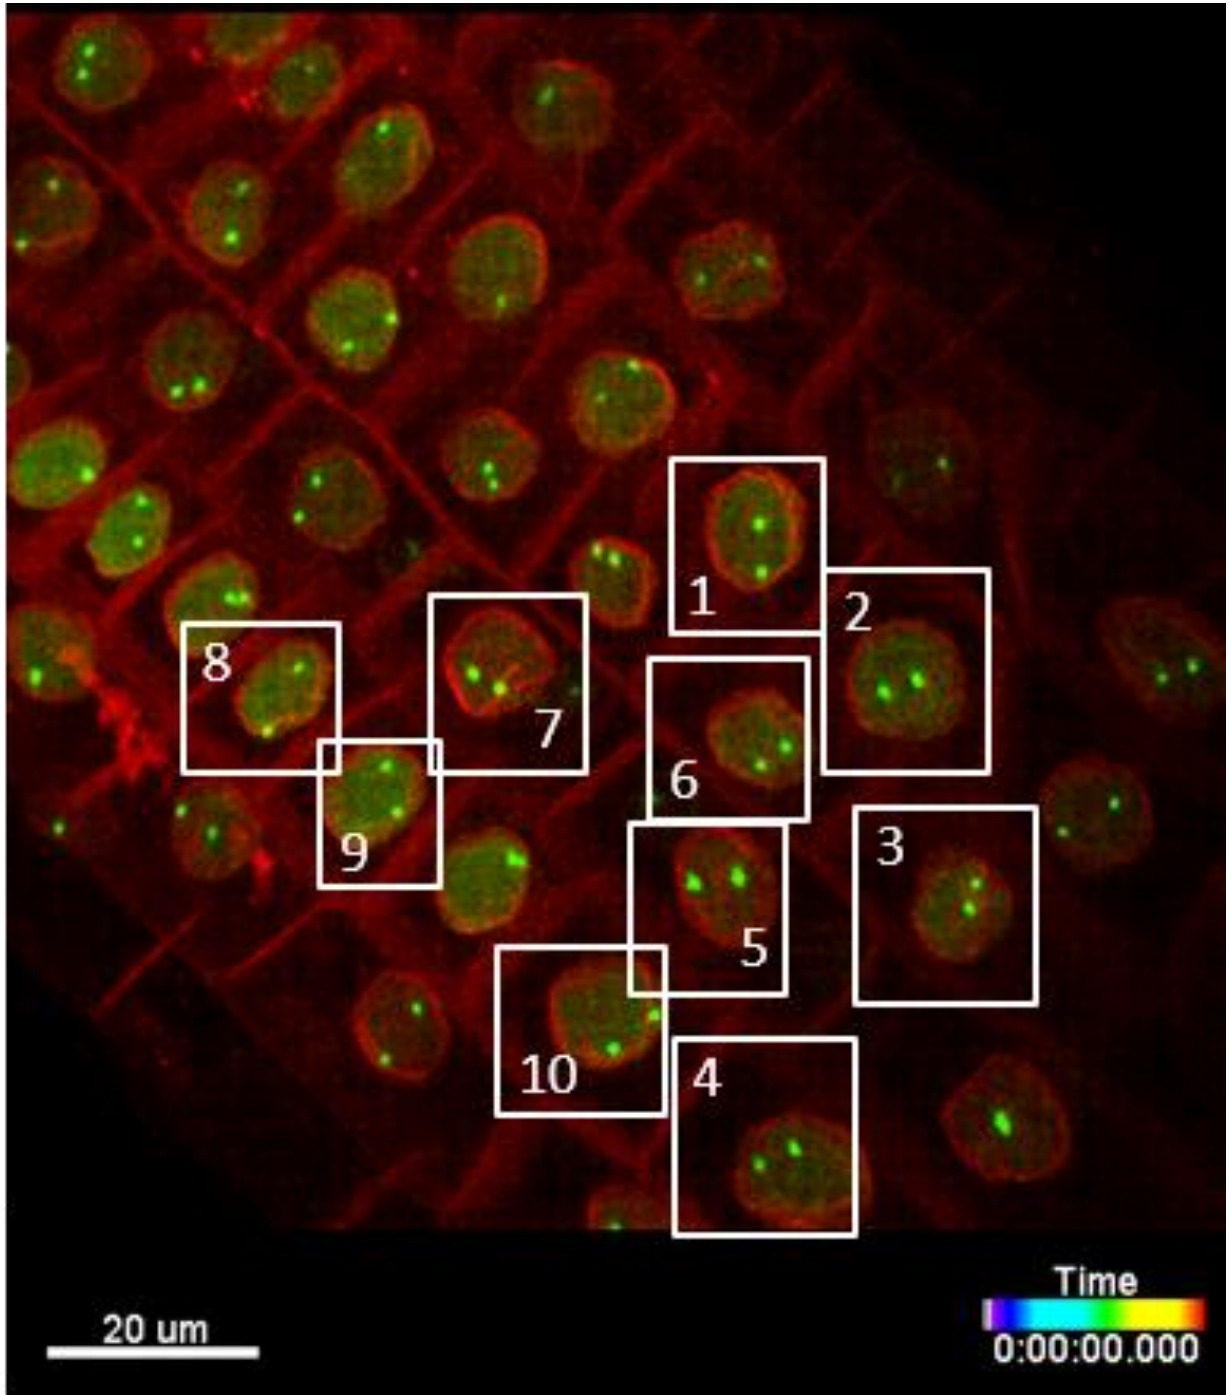

**Figure 4B  
(enlarged)**

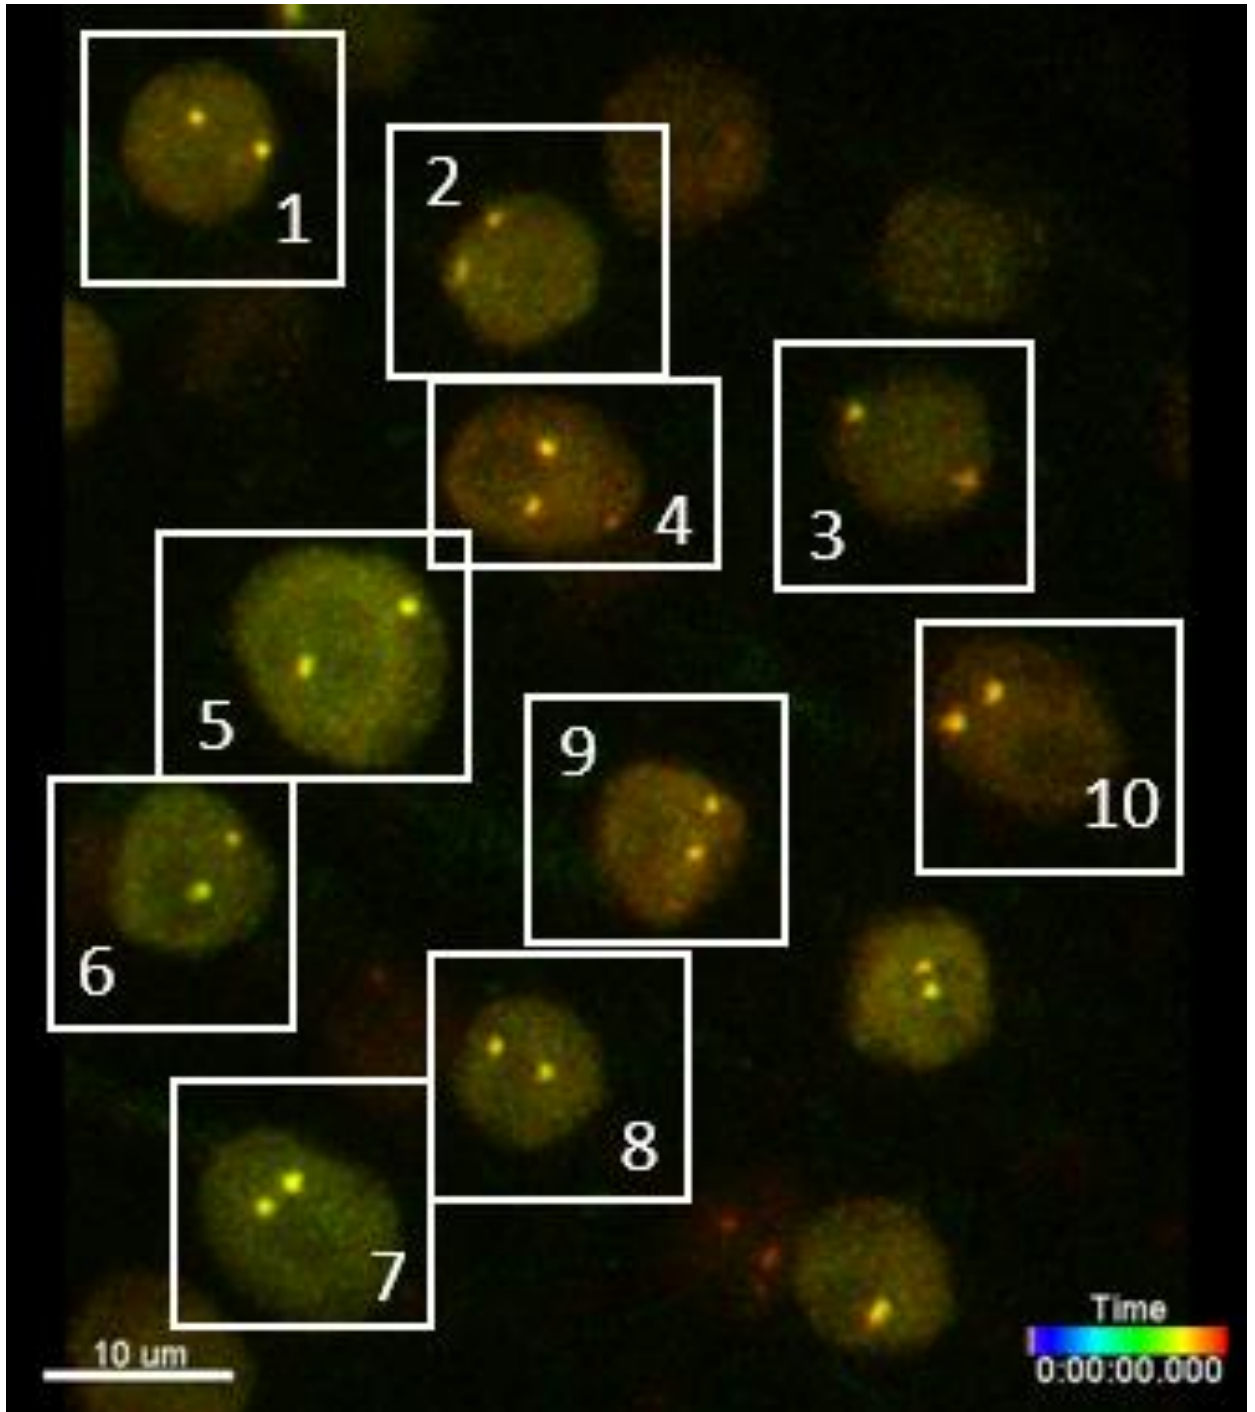

**Figure 5B**  
**(enlarged)**

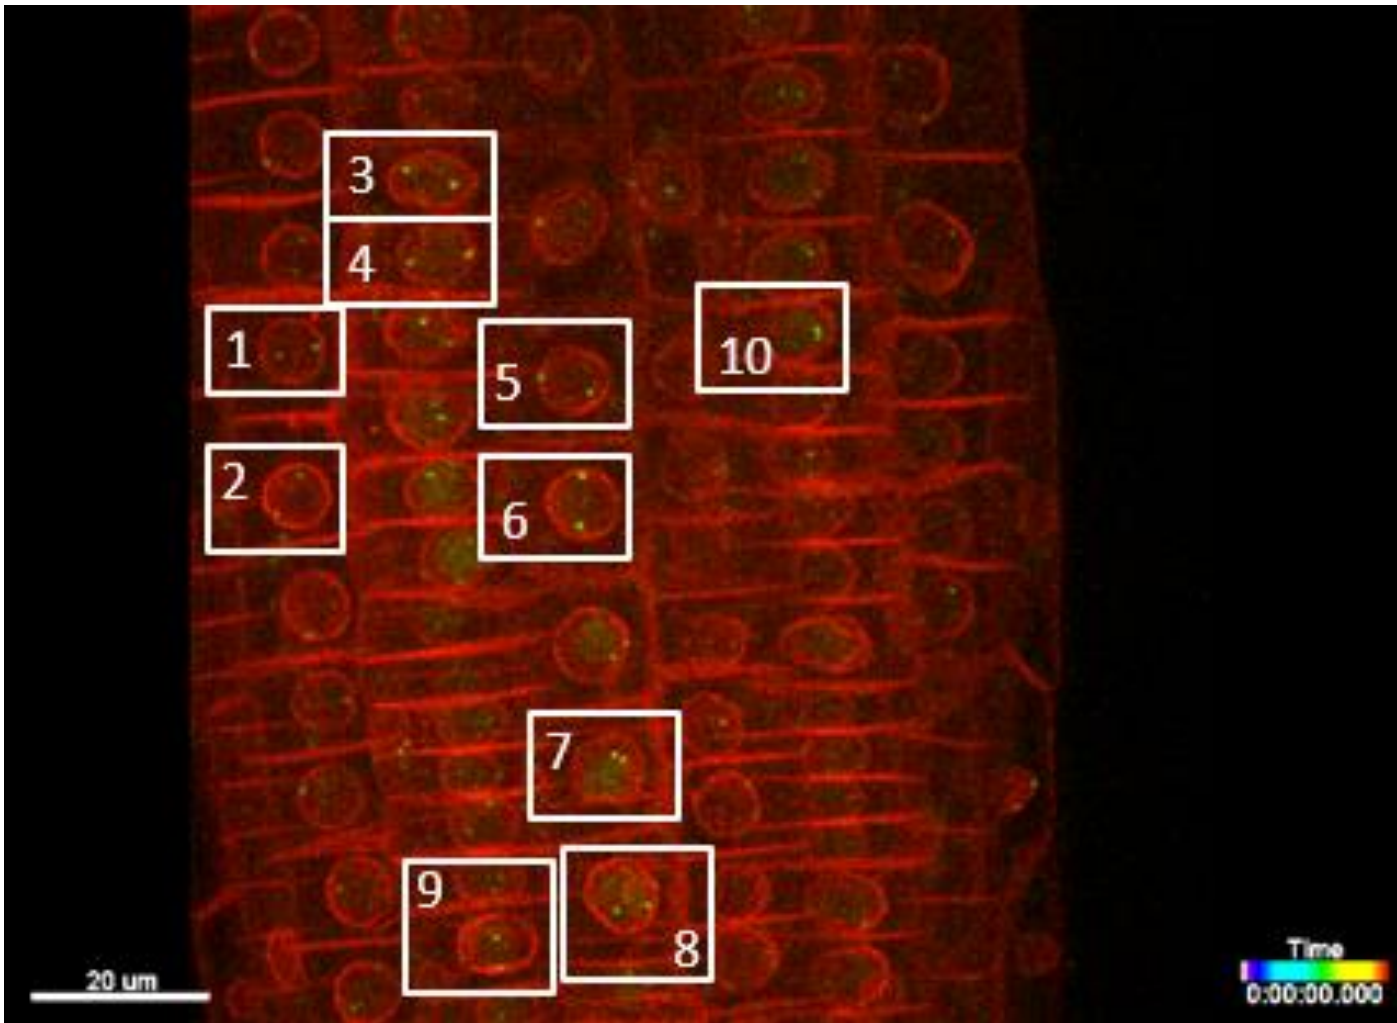

**Data Sheet 6B  
(enlarged)**

Data Sheet 9 Matzke et al
